# Supplementary material for: Joint consultations with patient, GP and geriatric psychiatrist for older adults with depression: - a focus group study
Source: Research Square preprint supplement (doi:10.21203/rs.3.rs-7789615/v1), 2025-10-29
Supplement: Supplementary file 1 [file 84d012e1cbfa51a42b5392f5.docx]

**Interview guides (translated from Norwegian)**

**Topics for GP Interviews:**

1. What challenges do you encounter in dealing with depression in older adults, including underdiagnosis and intervention difficulties?
2. What were your experiences recruiting patients for the study? Were there particular challenges in asking patients to participate? Please provide examples.
3. How did you experience using screening forms for detecting depression in elderly patients?
4. How did the logistics of inviting patients who screened positive and their follow-up consultations work, and how did patients respond being contacted?
5. What were your experiences with the joint consultations? Did new aspects of the patients emerge? What role did the GPs take—who led the consultations? Did you learn anything new about assessing or speaking with psychiatric patients? Please provide examples.
6. Do you believe this method could increase the risk of overdiagnosis or overtreatment?
   a. Do you have reservations about identifying or treating depressed elderly patients who have not explicitly expressed a desire for help?
7. Has participation in joint consultations affected the ongoing GP-patient relationship? Did it become too intimate, or did it help strengthen the therapeutic alliance?
8. To what extent did you experience a sense of mastery when offering elderly patients with depression a structured treatment model rather than previous approaches?
9. The method requires significant time investment per patient. Did you find this a worthwhile use of your time, or did it come at the expense of other patients?
10. To what extent will you continue to request joint consultations with geriatric psychiatrists for older patients with depression?
11. To what extent will you use screening tools for diagnostic assessment of elderly patients in whom you suspect depression?

**Topics for Psychiatrist Interviews:**

1. How did the collaboration with GPs function regarding referral, joint consultations, and subsequent follow-ups? Please provide examples.
2. Did the joint consultations relieve workload while still maintaining safe and appropriate patient care? Provide examples.
3. Do you believe this method increases the risk of overdiagnosis or overtreatment? If yes, please provide examples.
   a. Do you have reservations about identifying or treating elderly patients who have not expressed a desire for intervention?
4. Did resource use for project patients lead to positive or negative feedback from the department or administration, and did this affect implementation? Please provide examples.
5. Do you think this kind of collaboration with GPs may improve overall cooperation—e.g., facilitating discharge and transition of care to GPs? Could a “faster in, faster out” effect be envisioned?
6. To what extent will you initiate joint consultations with GPs when you believe this may support follow-up care for the patient?

**Note:**
For all questions, participants will be asked to illustrate their experiences with concrete examples.
